# Supplementary material for: The 31-nucleotide Y4-RNA fragment in plasma is a potential novel biomarker
Source: PubMed Central journal article supplement — Noncoding RNA Res. 2019 Dec 17;5(1):37–40. doi: 10.1016/j.ncrna.2019.12.001 (PMC7078377; doi:10.1016/j.ncrna.2019.12.001), 2019-12-17
Supplement: mmc1.pdf [file mmc1.pdf]

# Supplementary Figure S1A

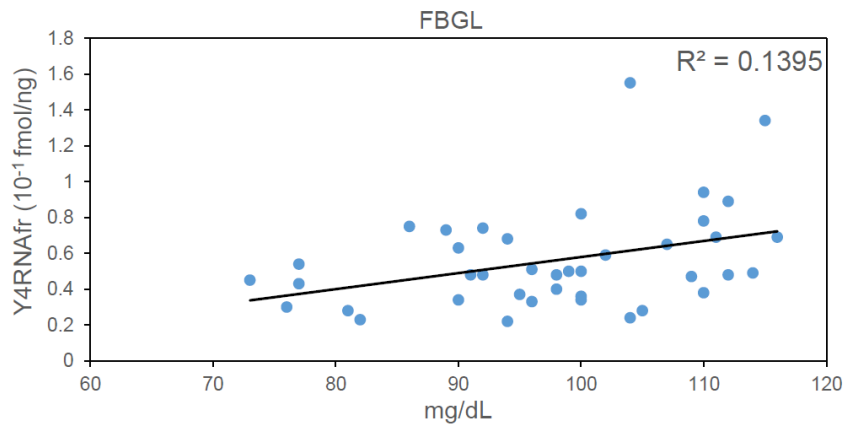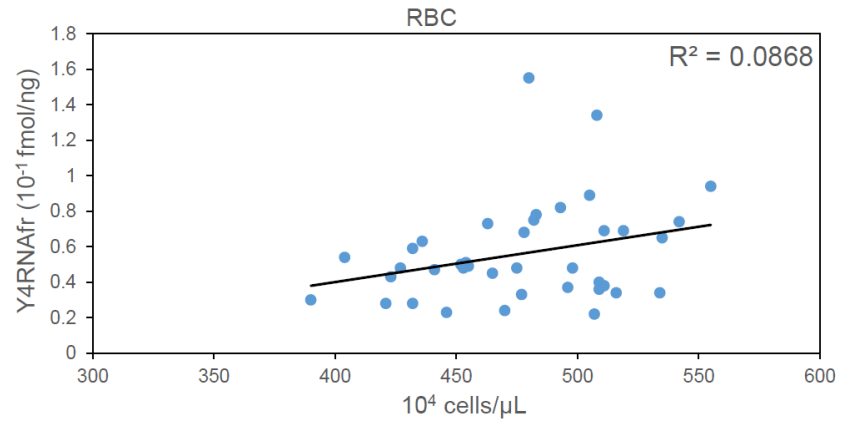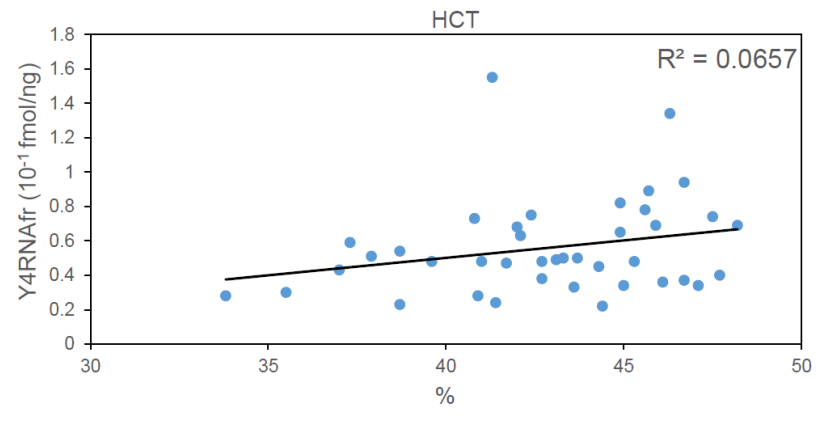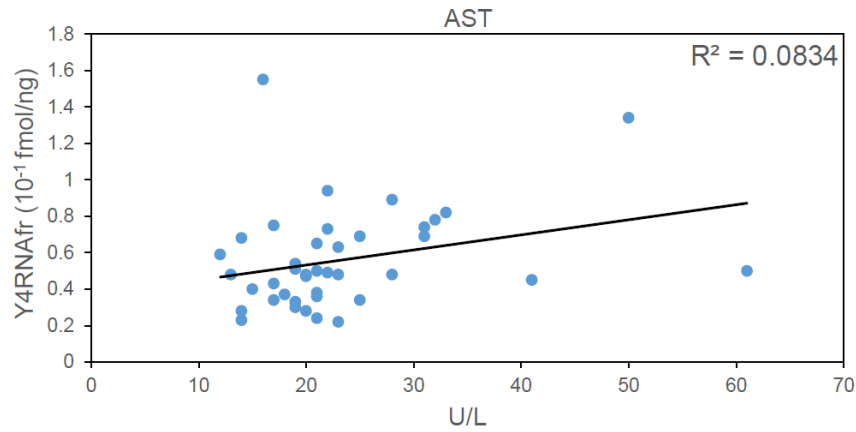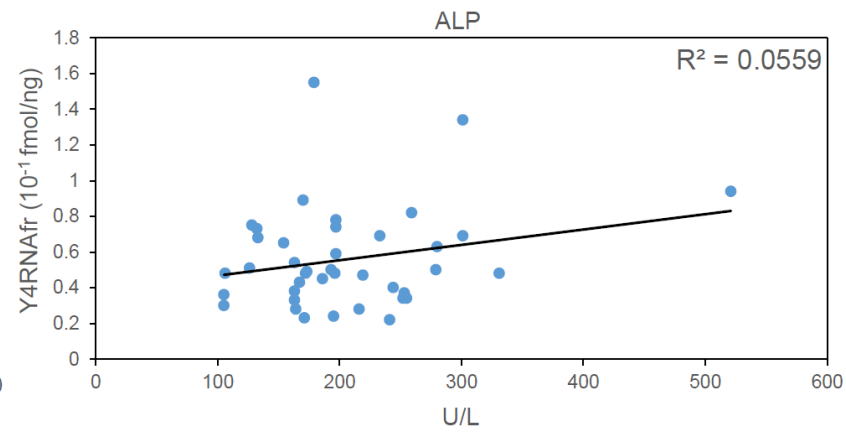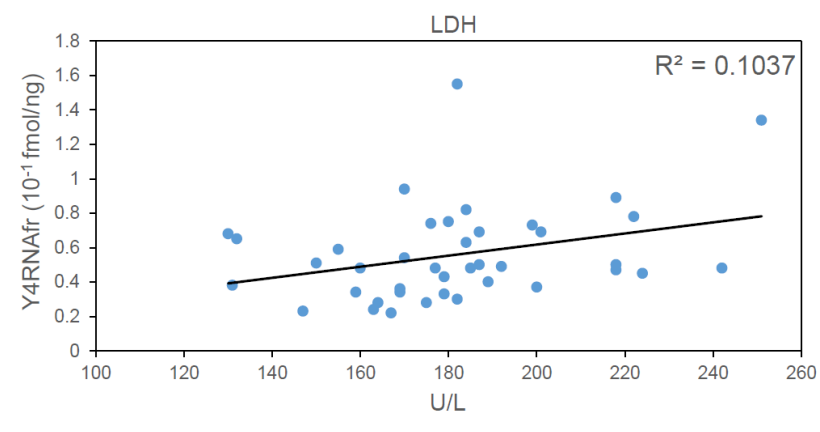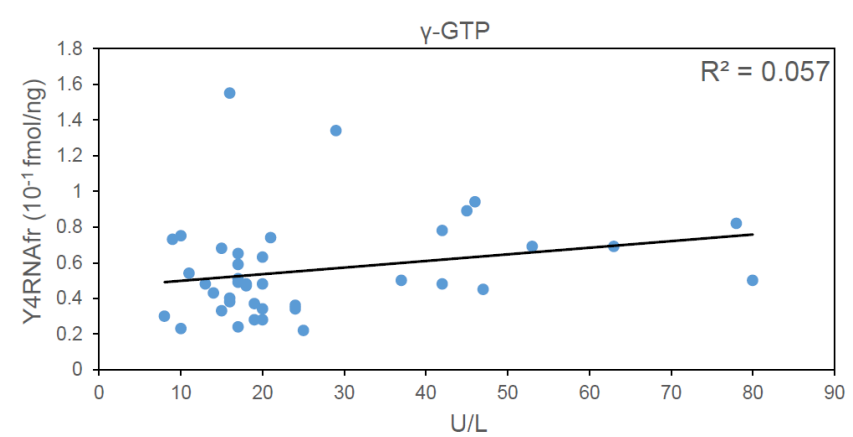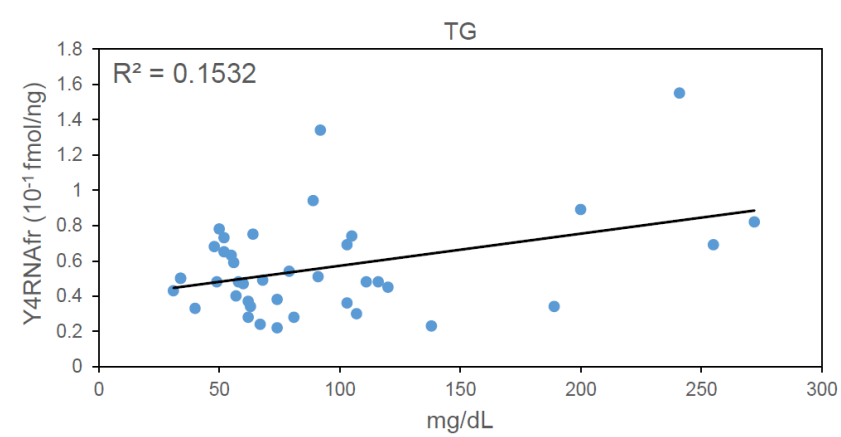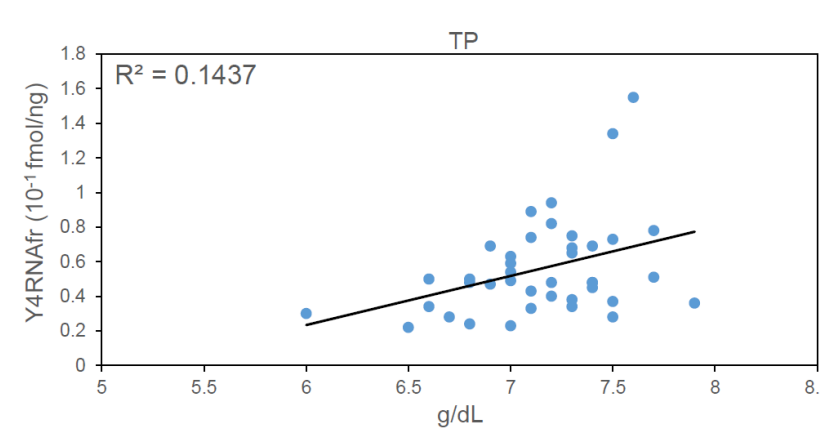

# Supplementary Figure S1A

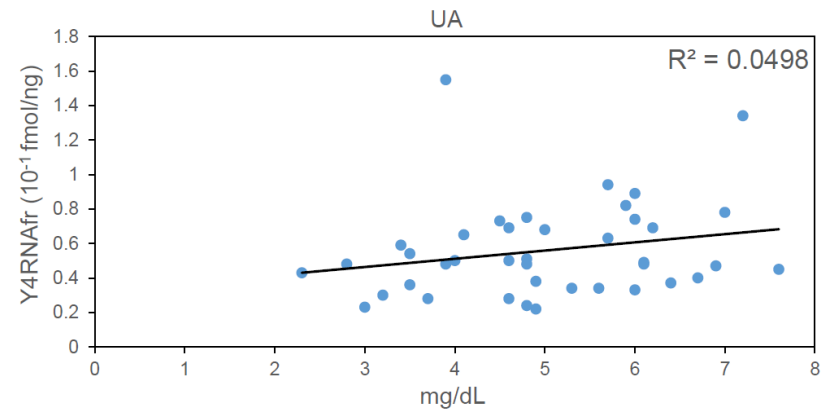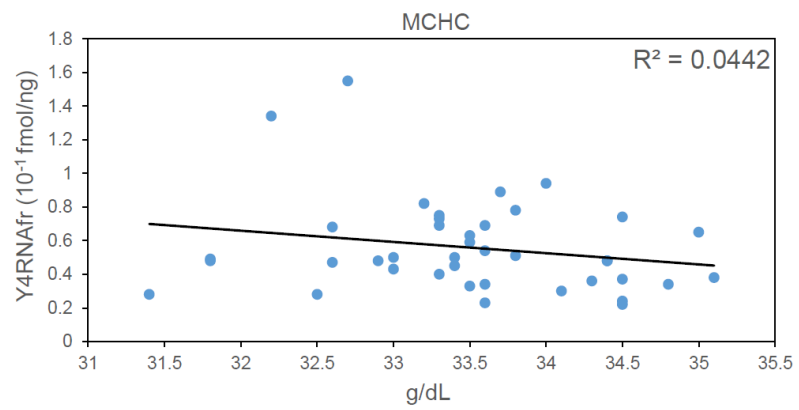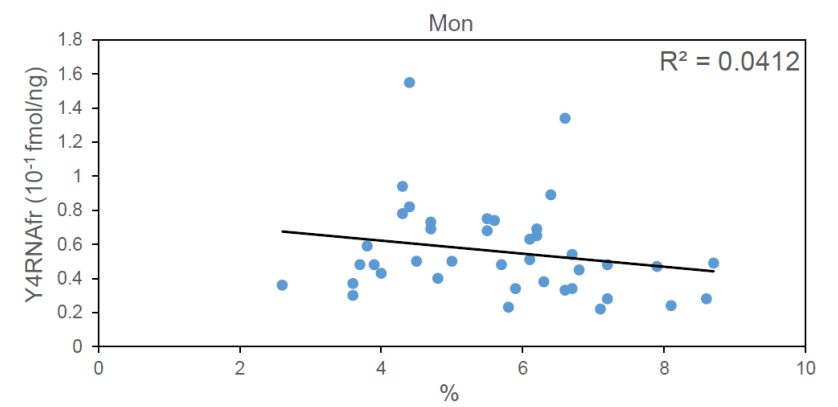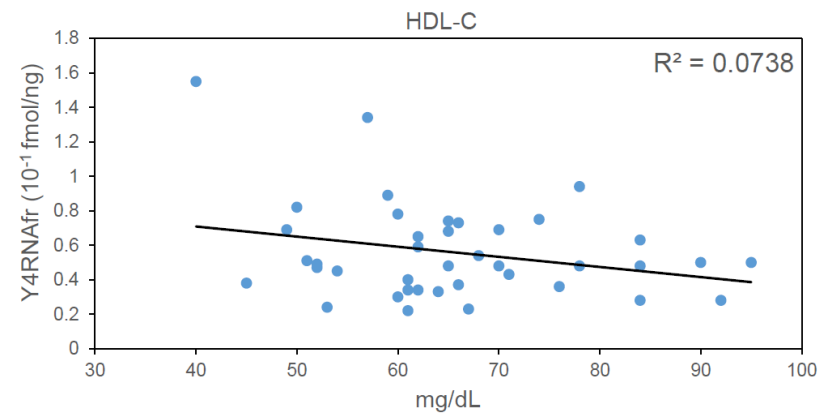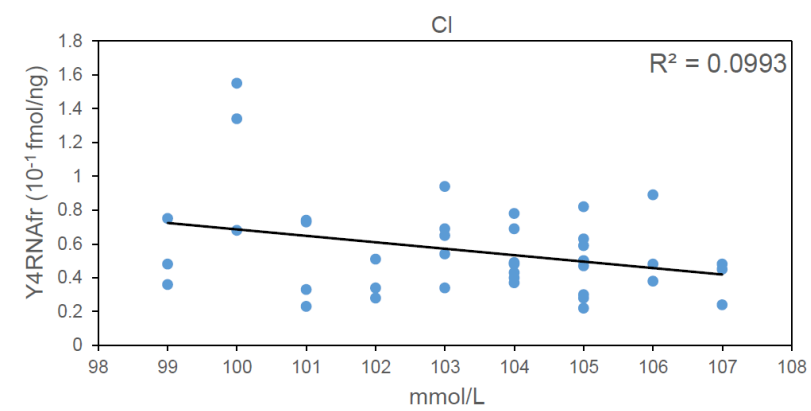

# Supplementary Figure S1B

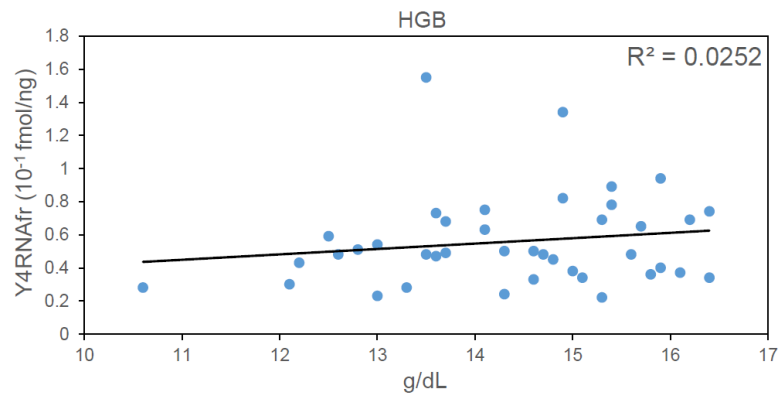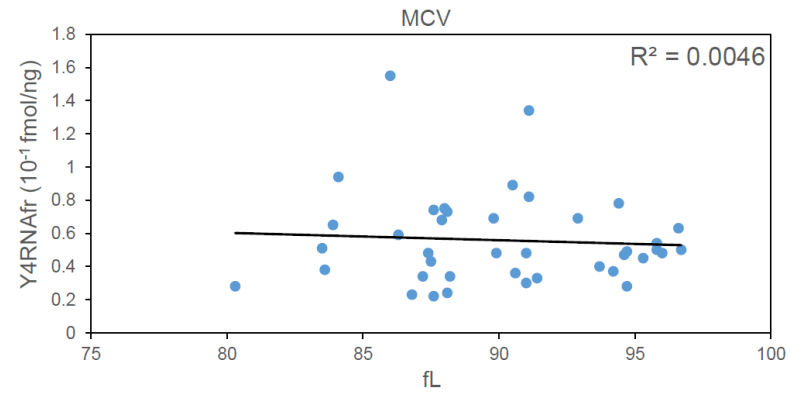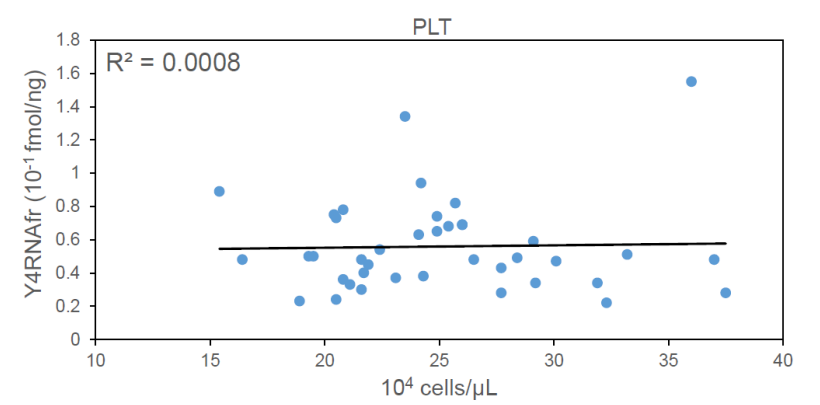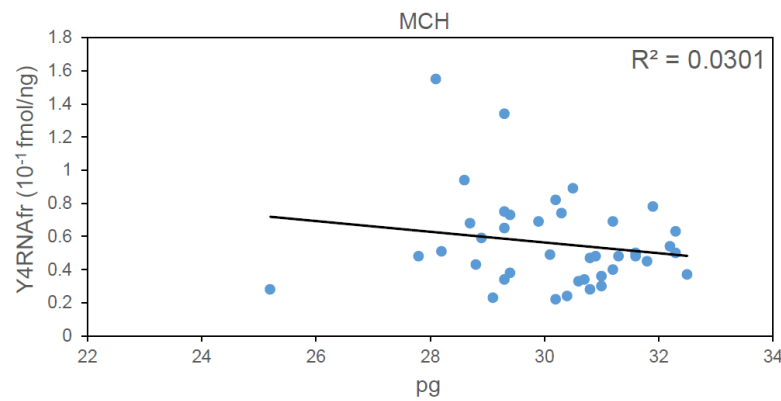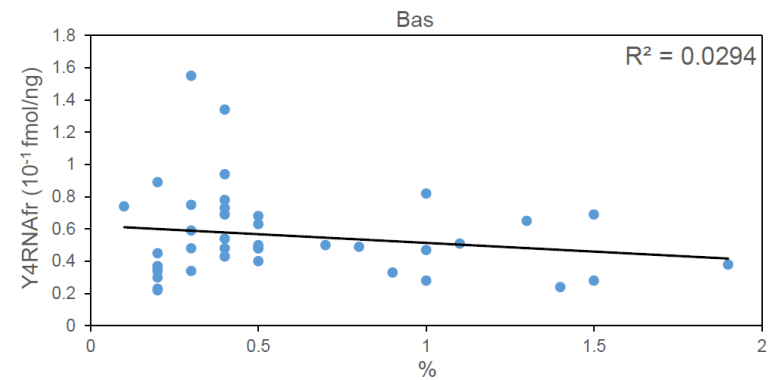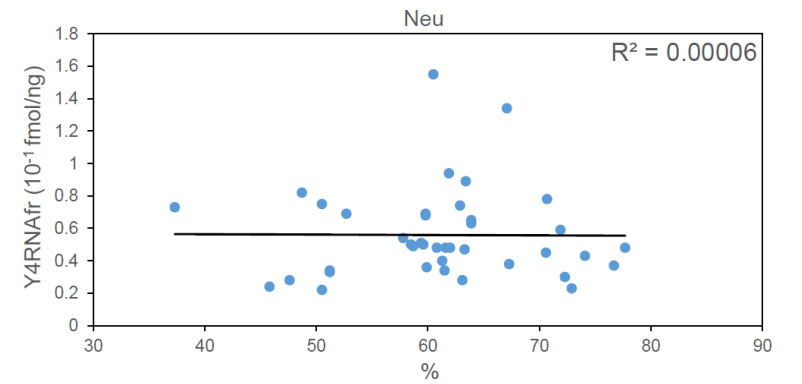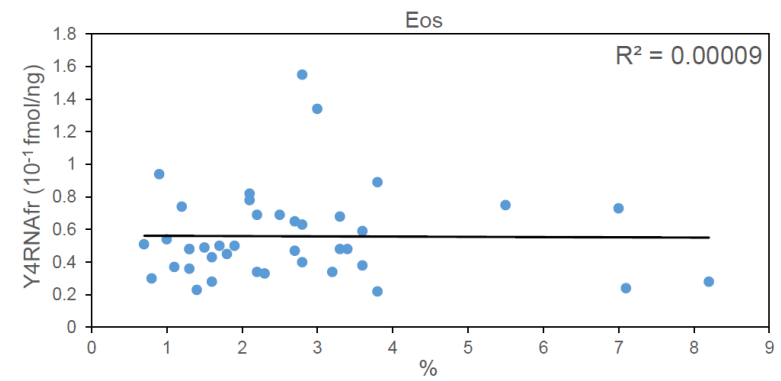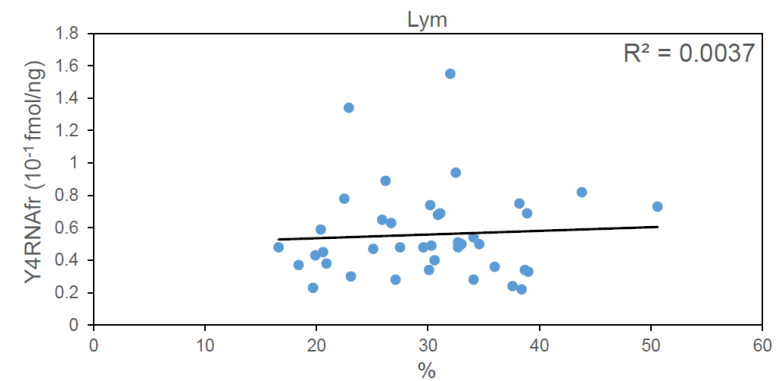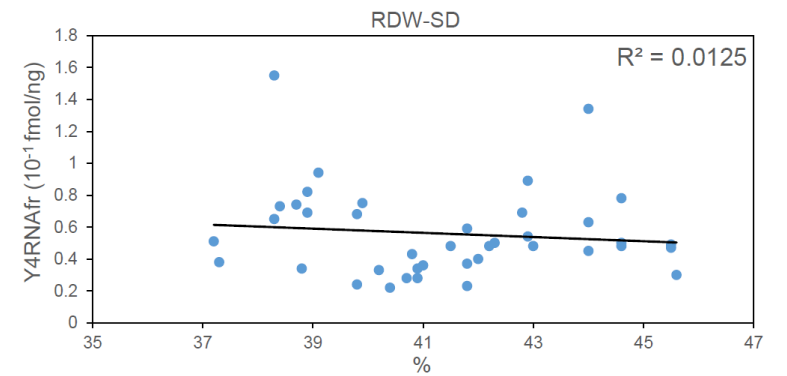

# Supplementary Figure S1B

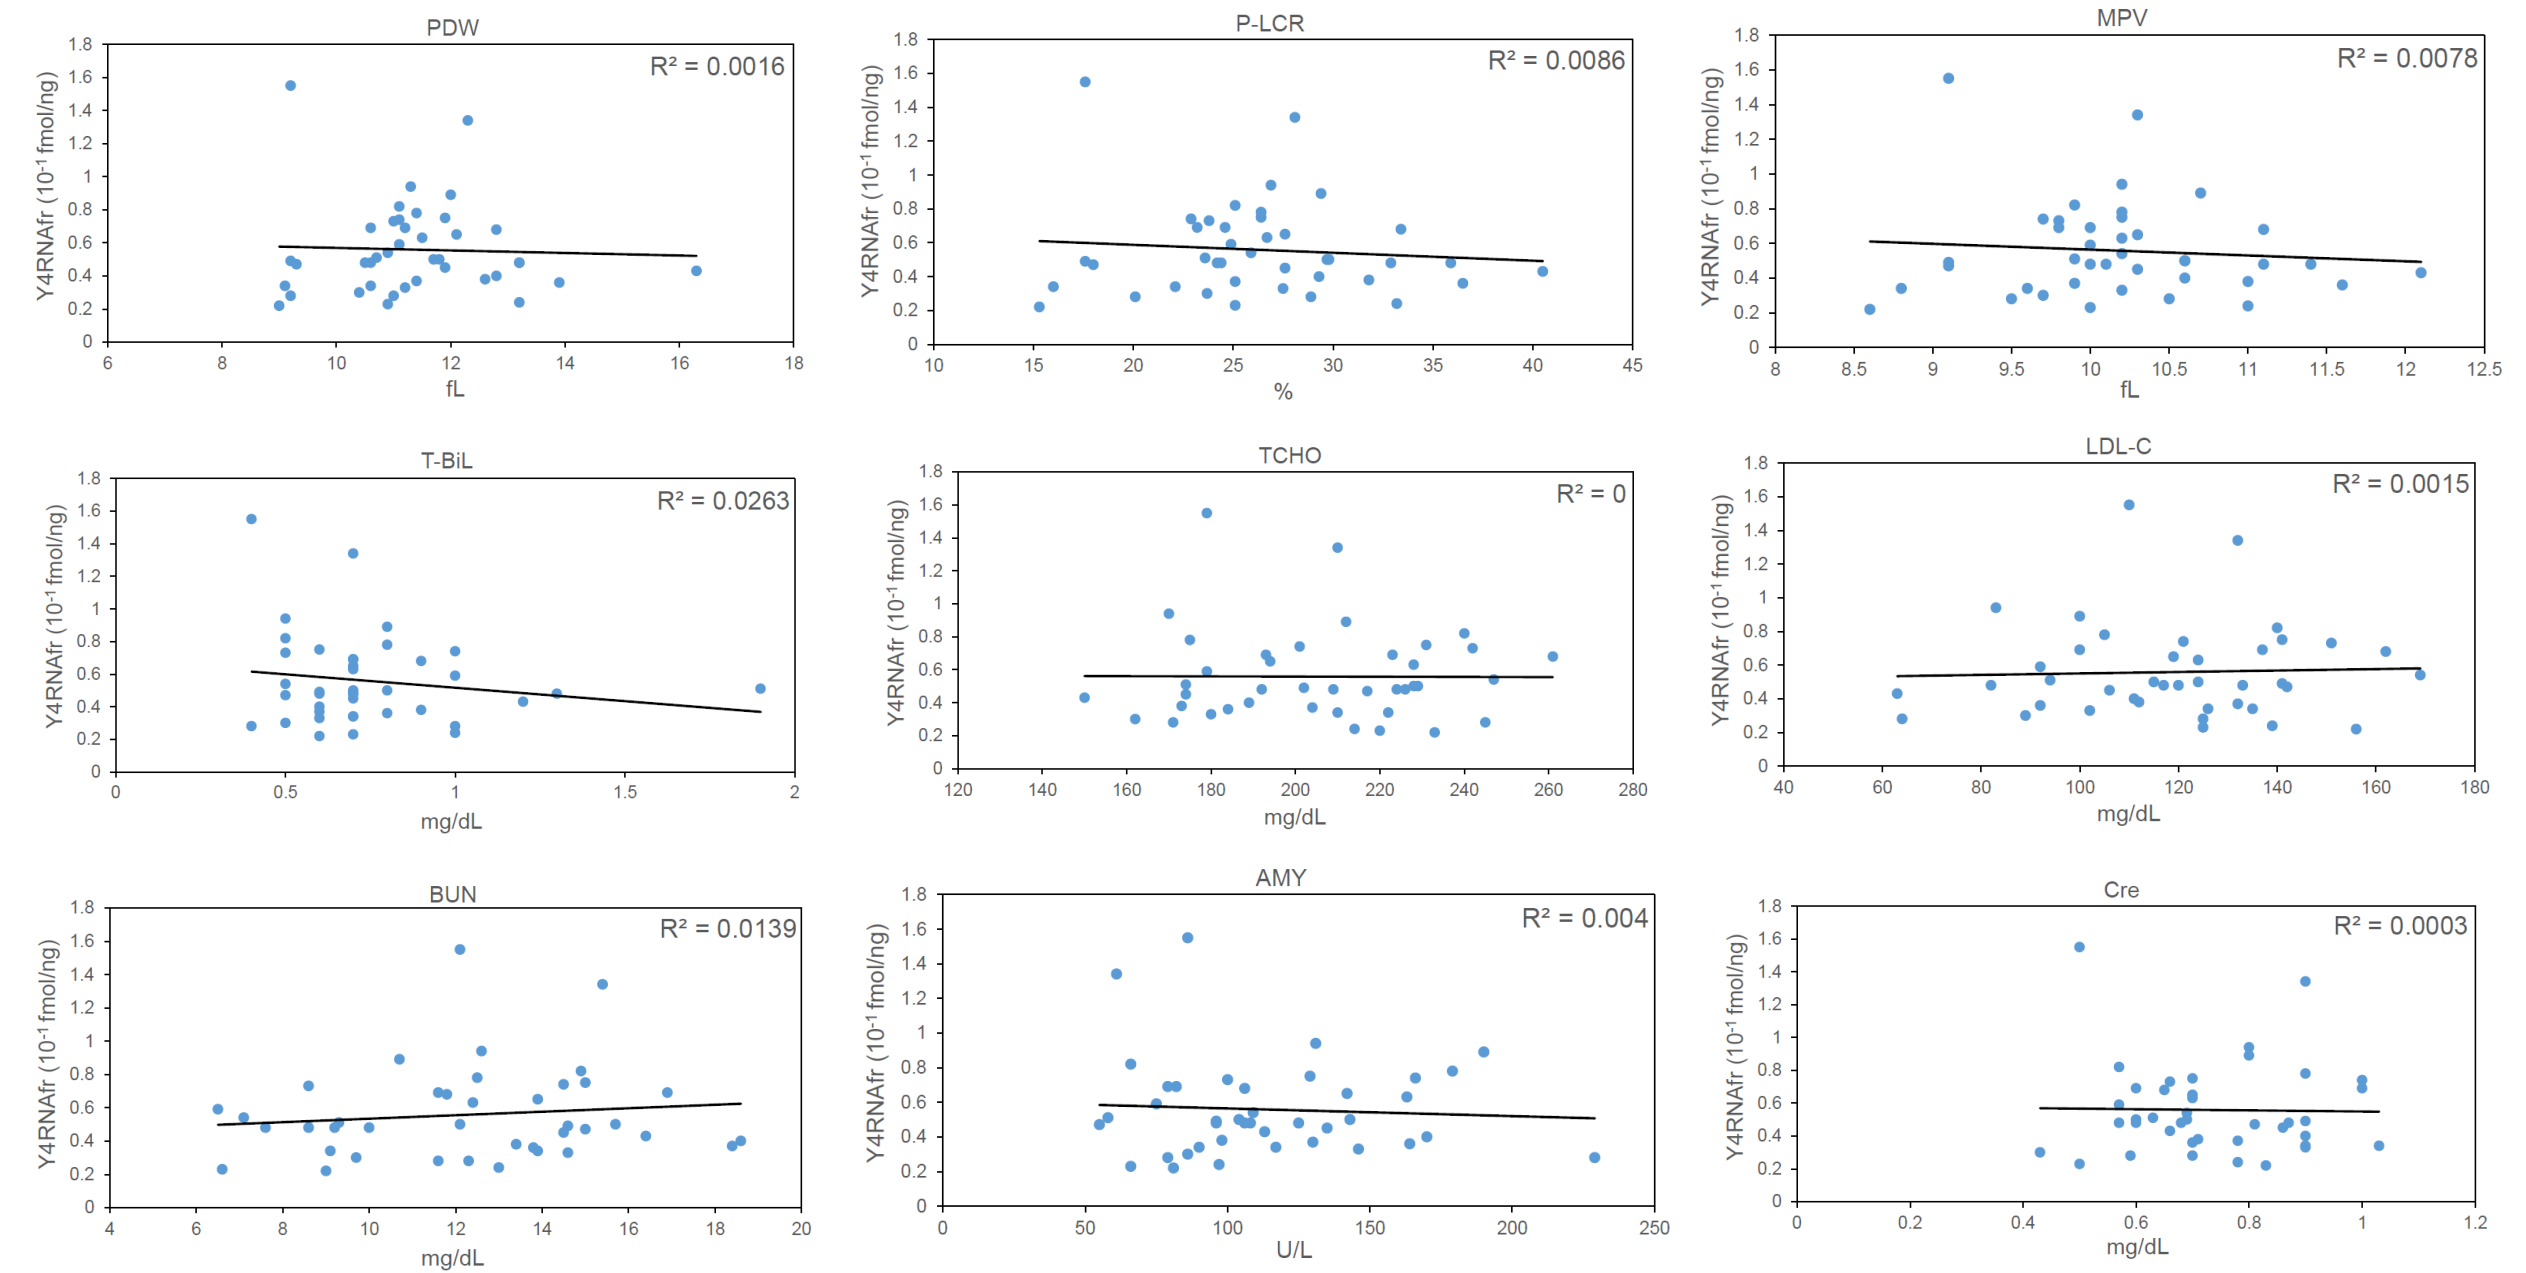

# Supplementary Figure S1B

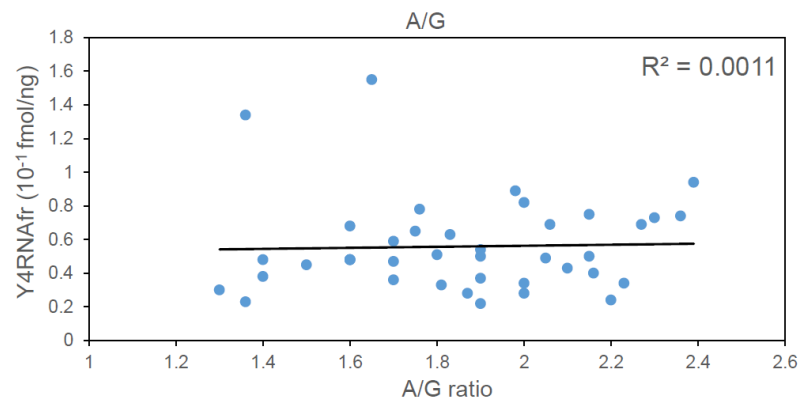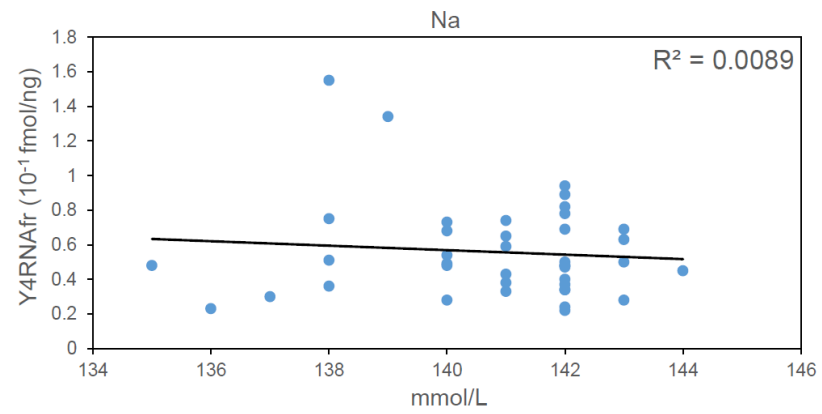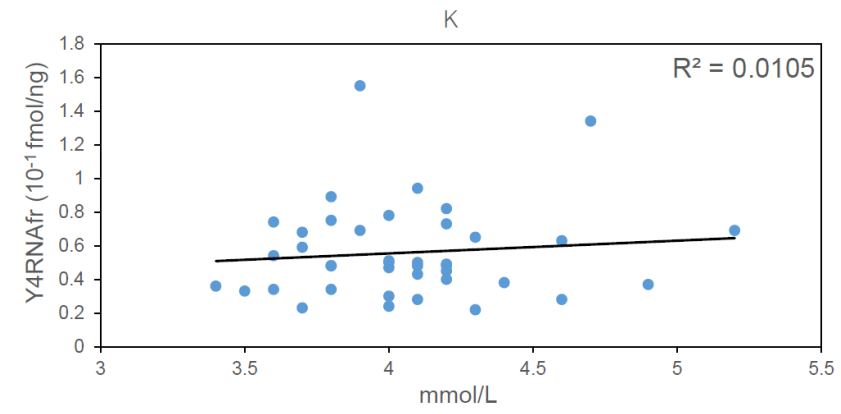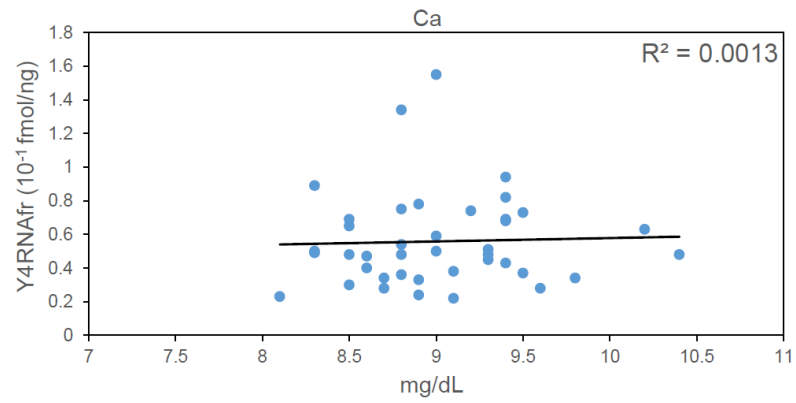

**Supplementary Fig. S1.** Correlations of the Y4RNAfr level in peripheral blood plasma with the levels of 36 test items in blood. (A) Weak positive correlations with the levels of FBGL, RBC, HCT, AST, ALP, LDH,  $\gamma$ -GTP, TG, TP, and UA, and weak negative correlations with the levels of MCHC, Mon, HDL-C, and Cl are observed. (B) Correlations with the levels of the other 22 test items are shown. R, correlation coefficient.
